# Supplementary material
Source: HighWire-hosted journal article supplement (https://www.ajnr.org/highwire/filestream/65108/field_highwire_adjunct_files/0/18-00727.pdf)
Supplement: 18-00727.pdf [file 18-00727.pdf]

**On-line Table: Parameters of automatic brain tissue and myelin volumetry determined via quantitative synthetic MRI pre- and postadministration of gadolinium-based contrast agent<sup>a</sup>**

|                              | WMV (mL)                   | GMV (mL)                    | CSFV (mL)                  | NV (mL)       | MYV (mL)                  | BPV (mL)                  | MYF (%)                  | ICV (mL)                   |
|------------------------------|----------------------------|-----------------------------|----------------------------|---------------|---------------------------|---------------------------|--------------------------|----------------------------|
| With metastases pre-GBCA     | 538.82 ± 80.51             | 650.41 ± 84.91              | 229.54 ± 54.79             | 45.03 ± 22.22 | 174.71 ± 27.80            | 1234.12 ± 114.01          | 14.20 ± 1.84             | 1463.71 ± 127.94           |
| With metastases post-GBCA    | 565.46 ± 80.69             | 614.18 ± 97.41              | 208.77 ± 52.33             | 46.05 ± 18.61 | 184.85 ± 27.89            | 1227.35 ± 113.11          | 15.08 ± 1.95             | 1436.29 ± 123.47           |
| Difference                   | 26.65 ± 15.60 <sup>b</sup> | -36.23 ± 31.82 <sup>c</sup> | -20.77 ± 7.45 <sup>b</sup> | 1.02 ± 13.87  | 10.14 ± 5.42 <sup>b</sup> | -6.76 ± 8.69 <sup>c</sup> | 0.88 ± 0.59 <sup>c</sup> | -27.41 ± 9.49 <sup>b</sup> |
| Without metastases pre-GBCA  | 535.27 ± 83.31             | 625.24 ± 59.87              | 263.32 ± 66.21             | 31.96 ± 10.16 | 170.87 ± 29.34            | 1192.37 ± 133.64          | 14.24 ± 1.27             | 1455.84 ± 149.21           |
| Without metastases post-GBCA | 564.68 ± 84.64             | 590.75 ± 62.01              | 244.38 ± 64.13             | 34.52 ± 8.54  | 183.33 ± 30.38            | 1189.53 ± 134.27          | 15.33 ± 1.25             | 1434 ± 145.98              |
| Difference                   | 29.42 ± 11.99 <sup>b</sup> | -34.49 ± 15.03 <sup>b</sup> | -18.94 ± 4.62 <sup>b</sup> | 2.56 ± 4.80   | 12.46 ± 3.94 <sup>b</sup> | -2.84 ± 5.50 <sup>d</sup> | 1.09 ± 0.31 <sup>b</sup> | -21.84 ± 7.20 <sup>b</sup> |

**Note:**—WMV indicates WM volume; GMV, GM volume; CSFV, CSF volume; NV, non-WMV/GM/CSF volume; MYV, myelin volume; BPV, brain parenchymal volume; MYF, myelin volume/brain parenchymal volume.

<sup>a</sup> Data are mean ± SD.

<sup>b</sup> Wilcoxon signed rank test  $P < .001$ .

<sup>c</sup> Wilcoxon signed rank test  $P < .01$ .

<sup>d</sup> Wilcoxon signed rank test  $P < .05$ .
